# Supplementary material for: The AURKA inhibitor alters the immune microenvironment and enhances targeting B7-H3 immunotherapy in glioblastoma
Source: JCI journal article supplement (doi:10.1172/jci.insight.173700), 2025-02-10

Figure 2B

unedited gel

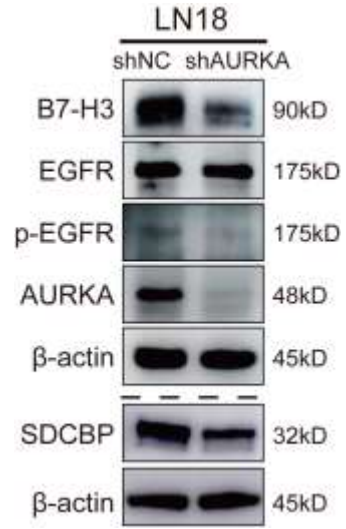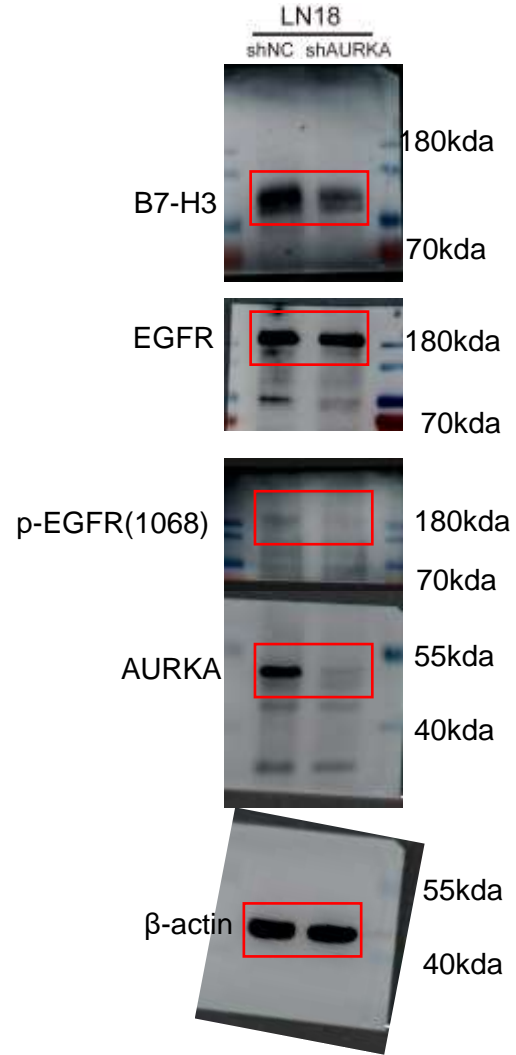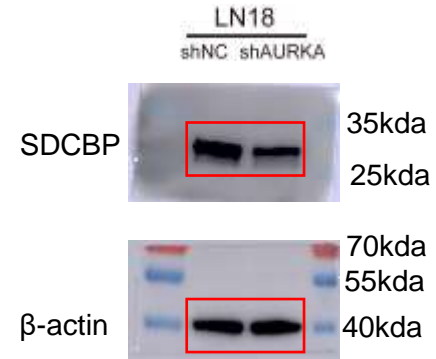

Figure 2C

unedited gel

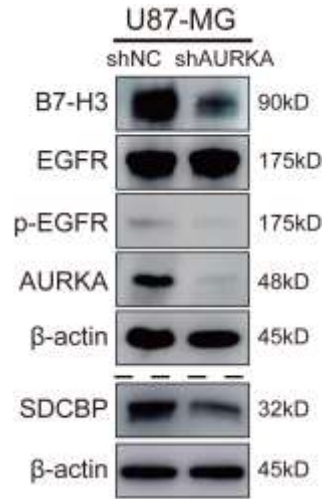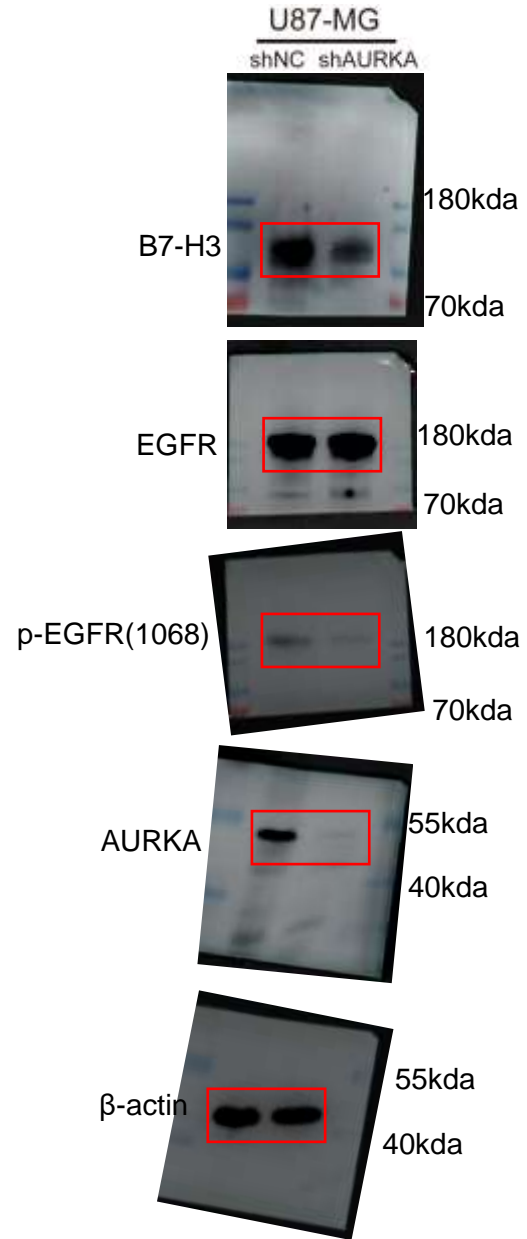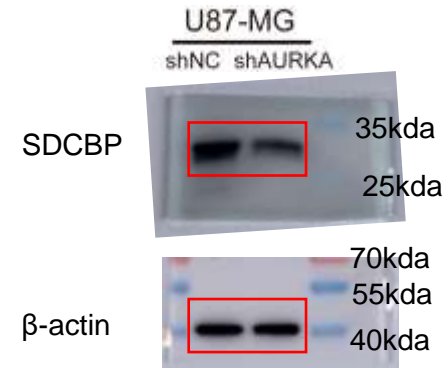

Figure 2E

unedited gel

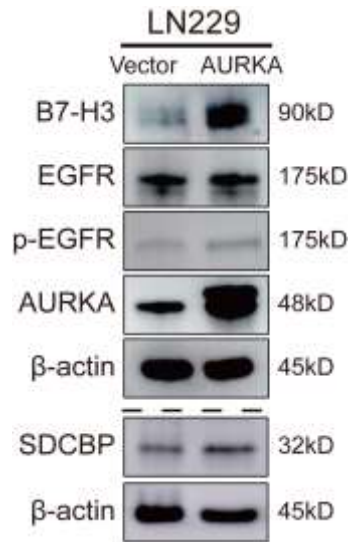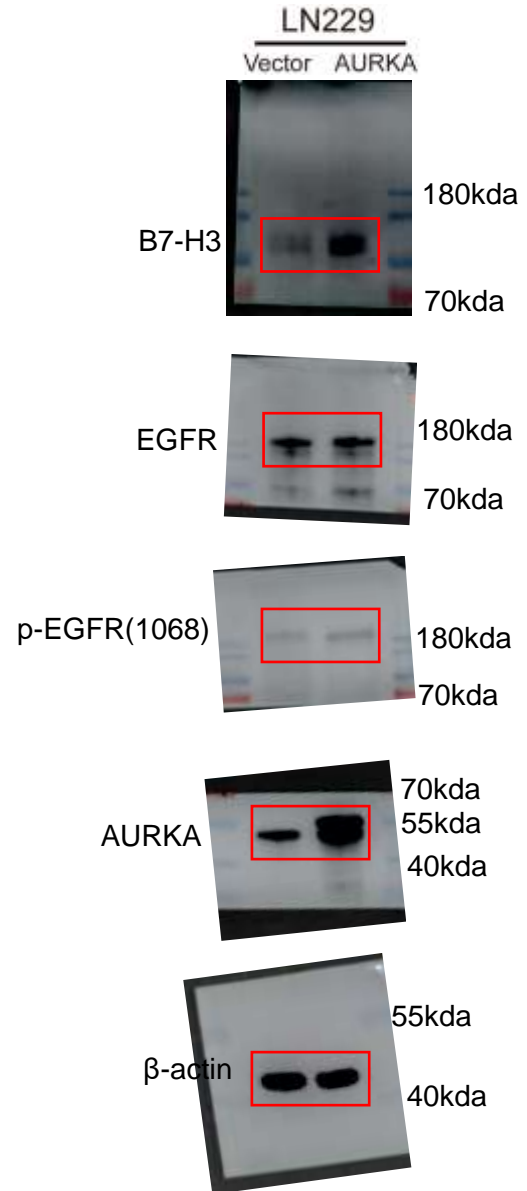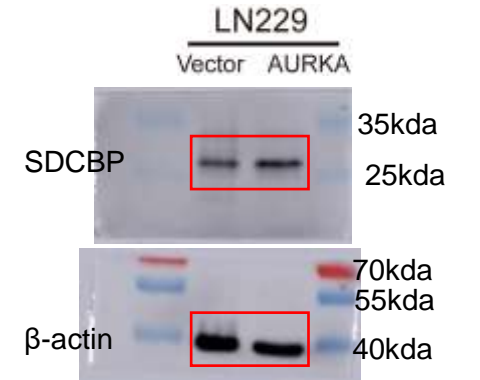

Figure 3A

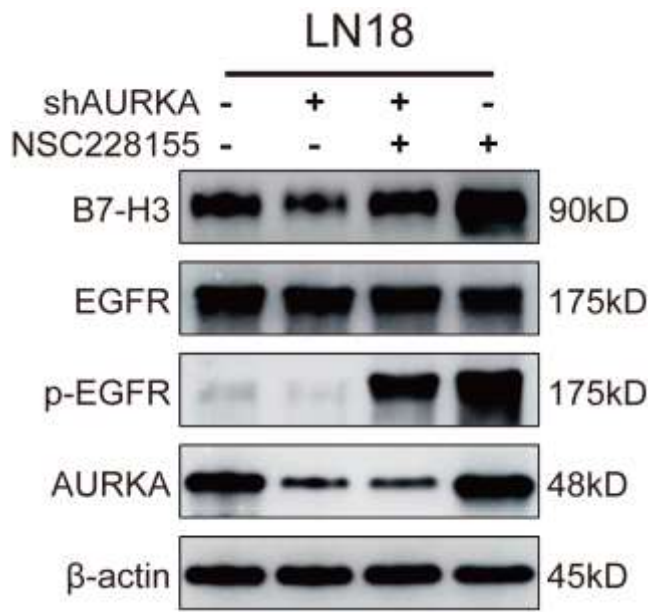

unedited gel

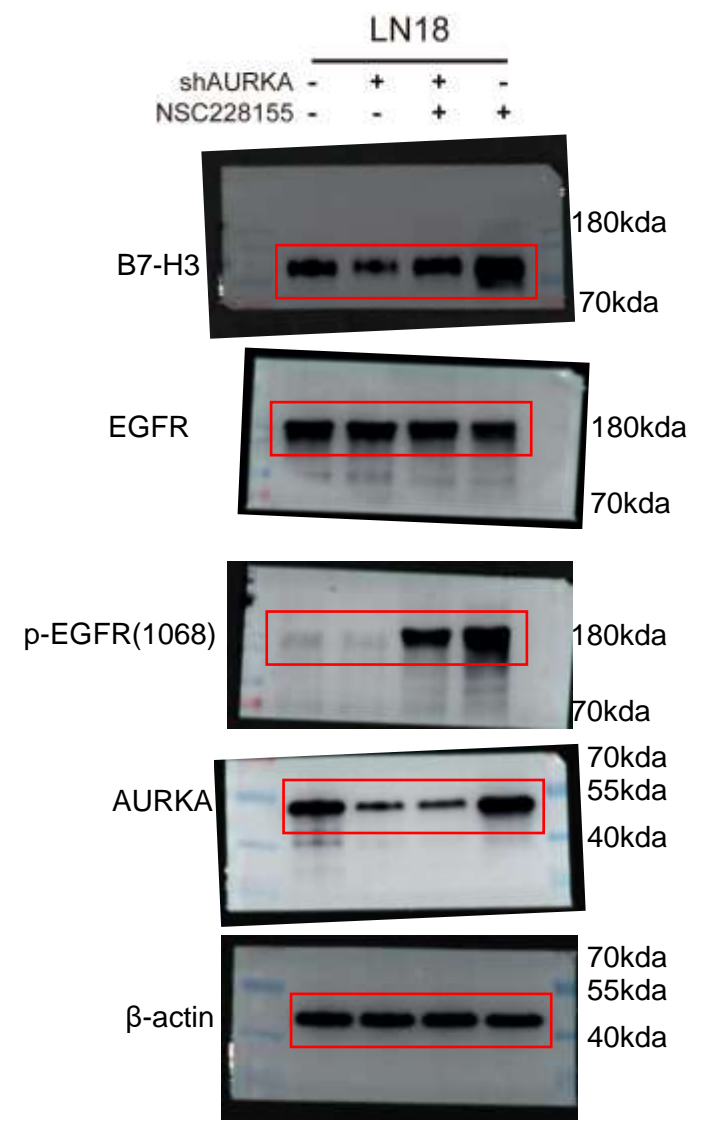

Figure 3D

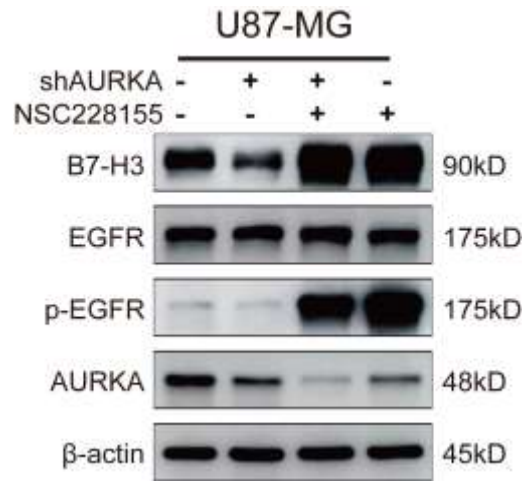

unedited gel

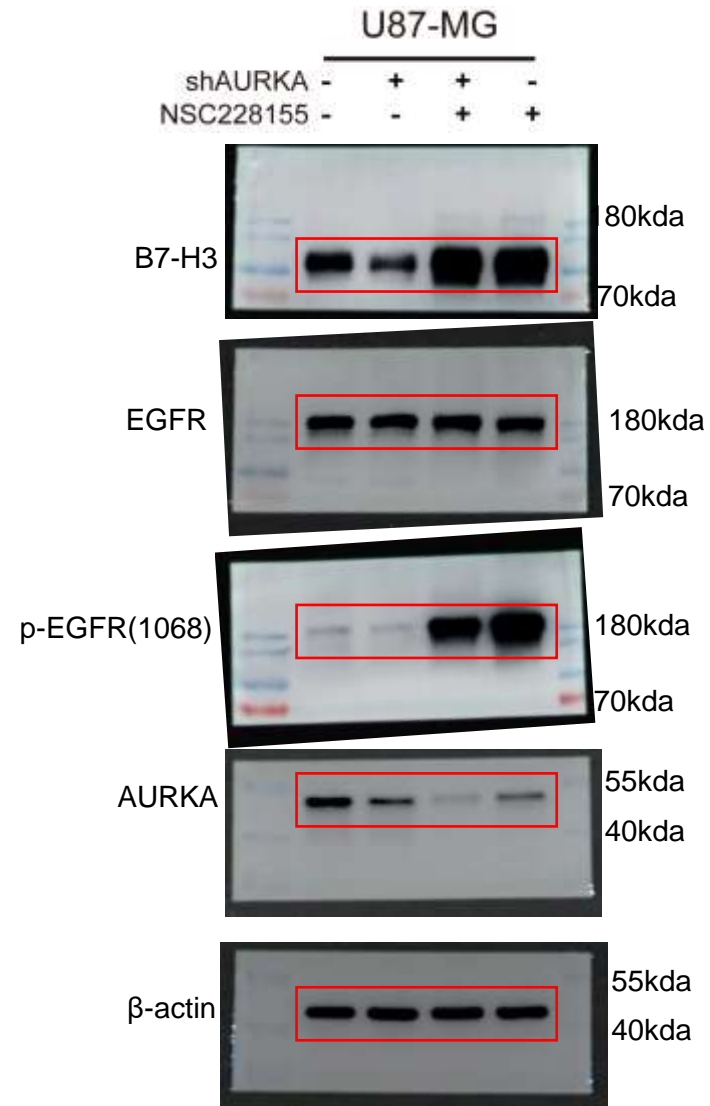

Figure 3G

unedited gel

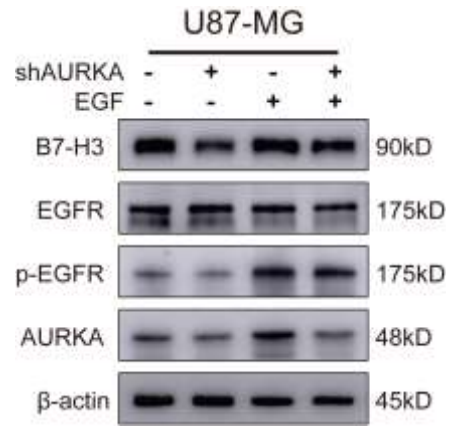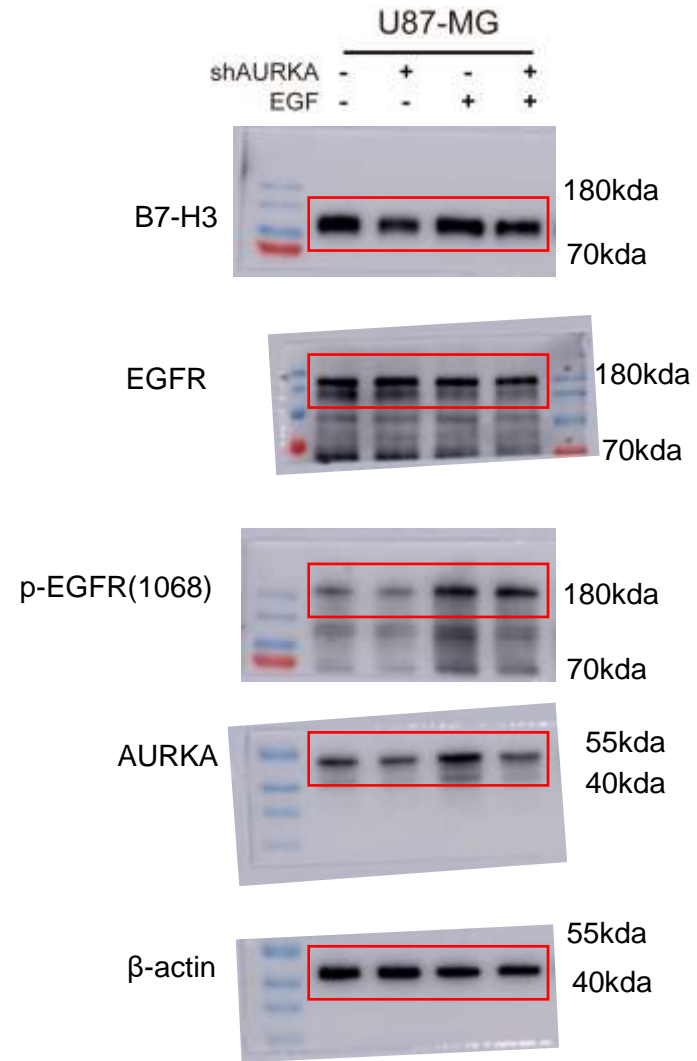

Figure 3I

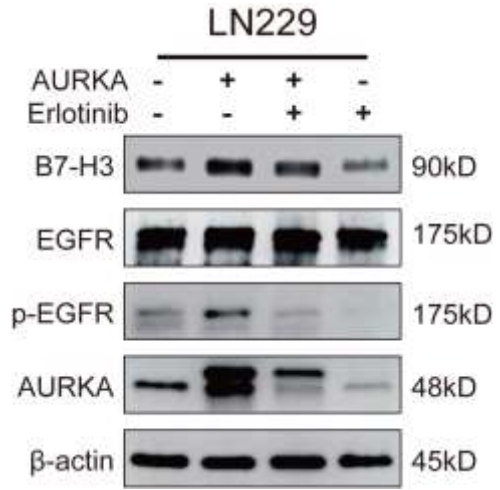

unedited gel

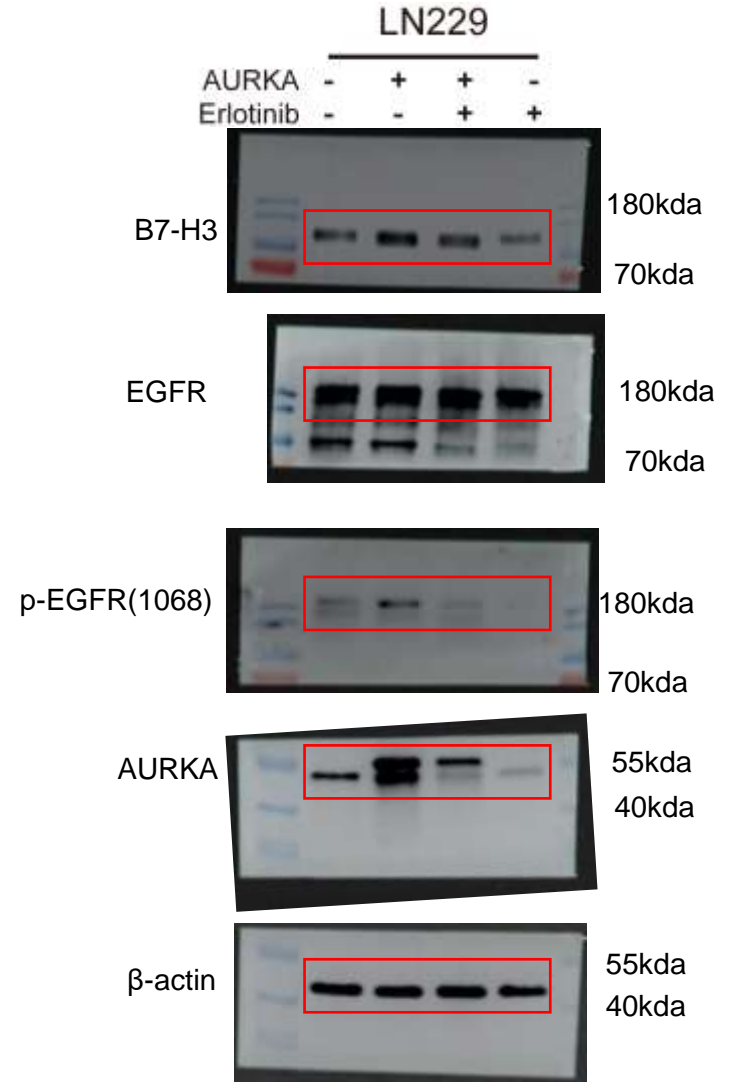

Figure 4A

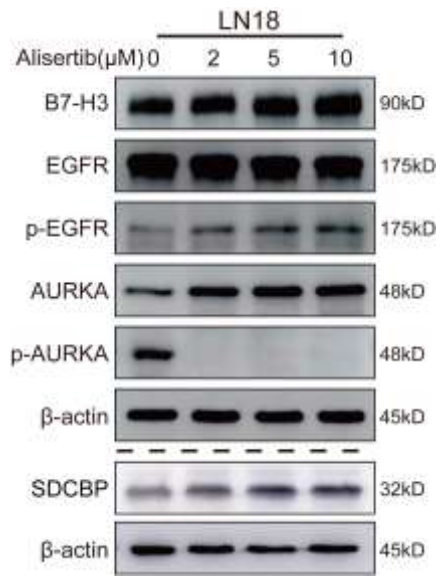

unedited gel

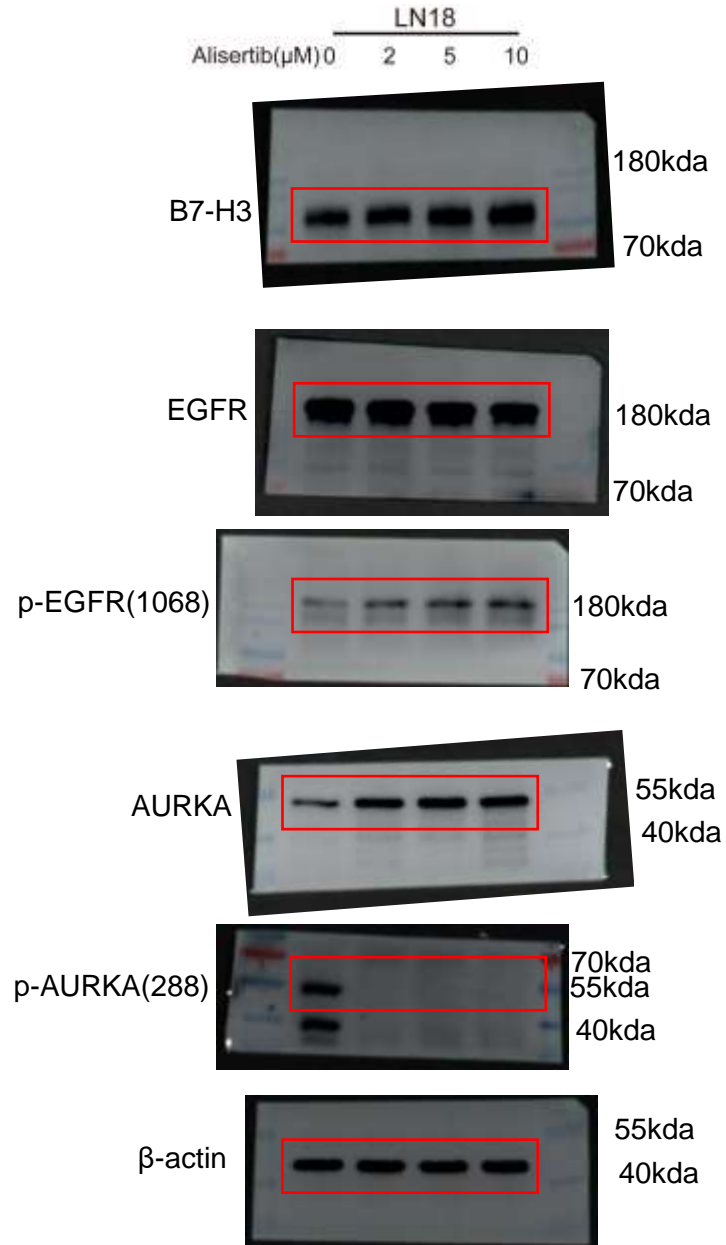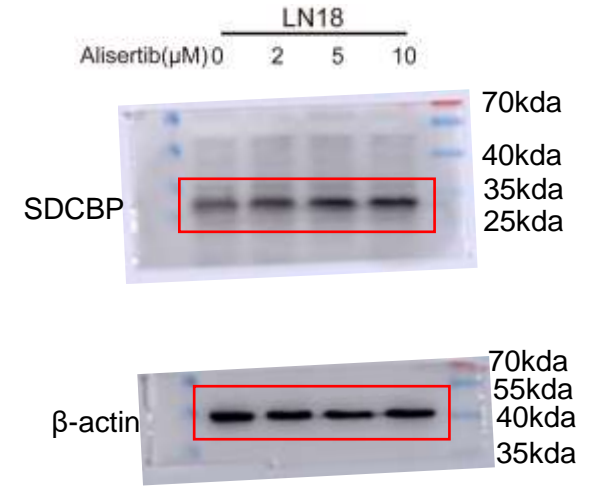

Figure 4B

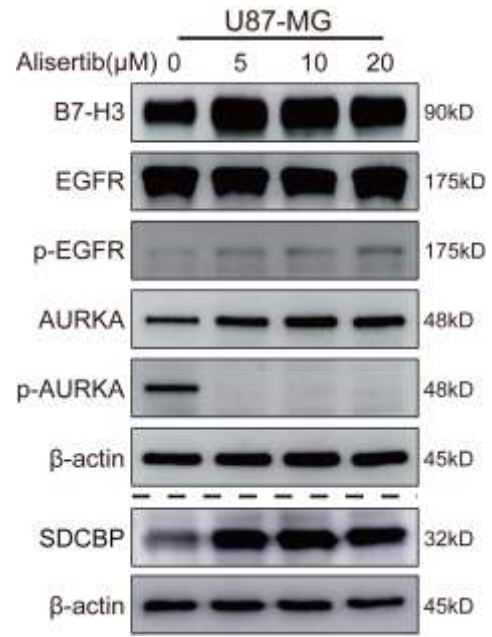

unedited gel

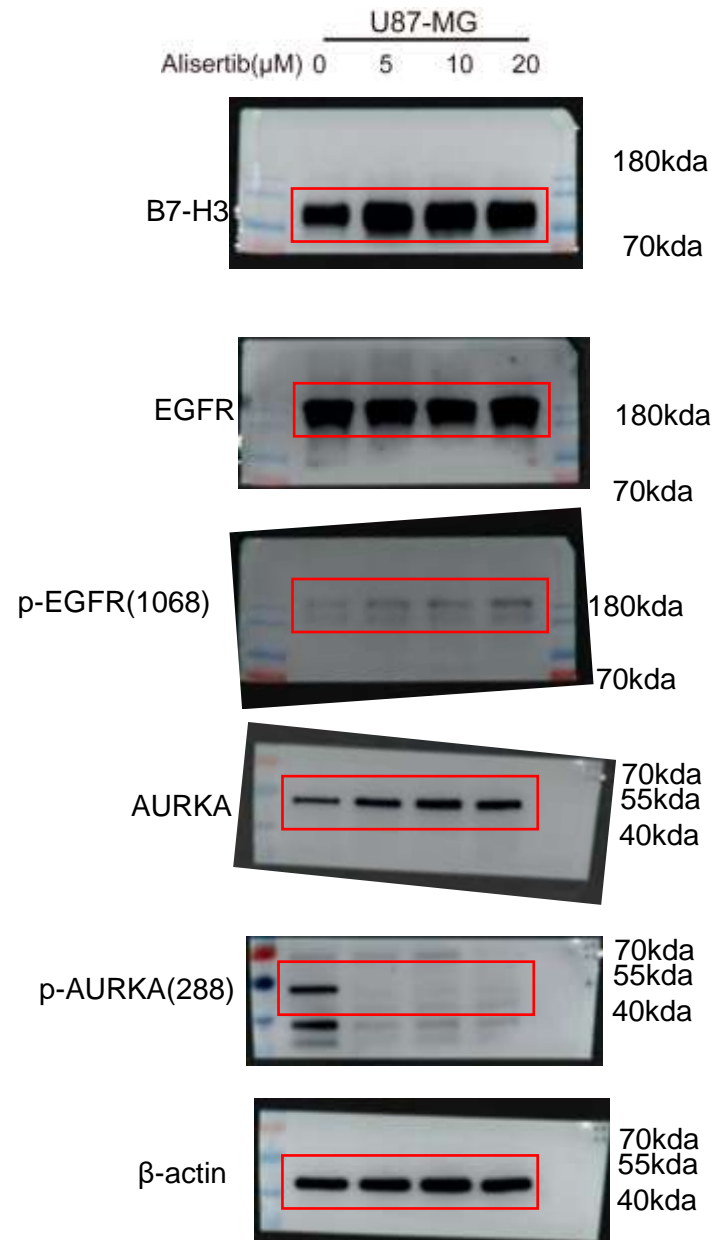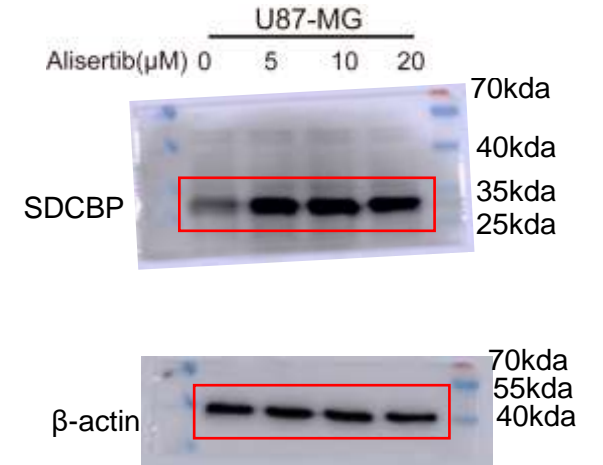

Figure 4C

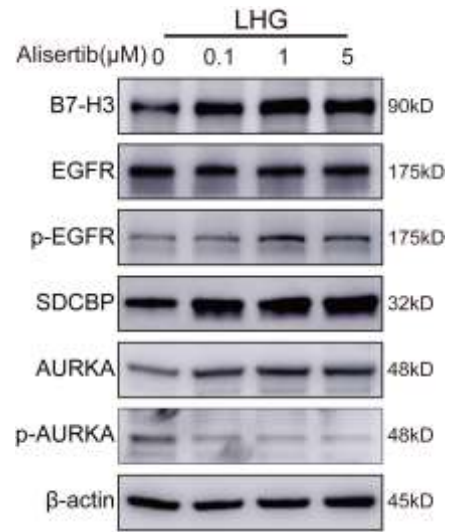

unedited gel

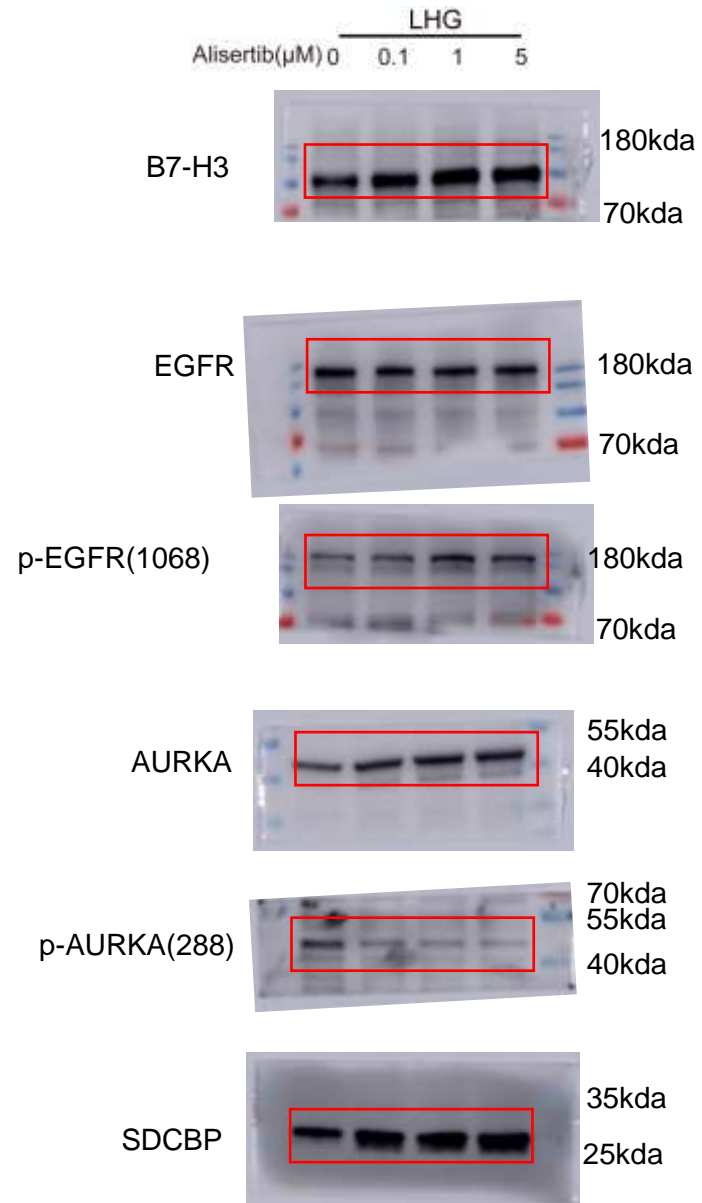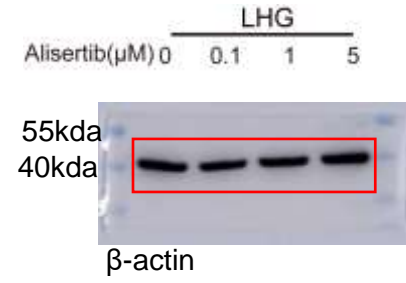

Figure 4D

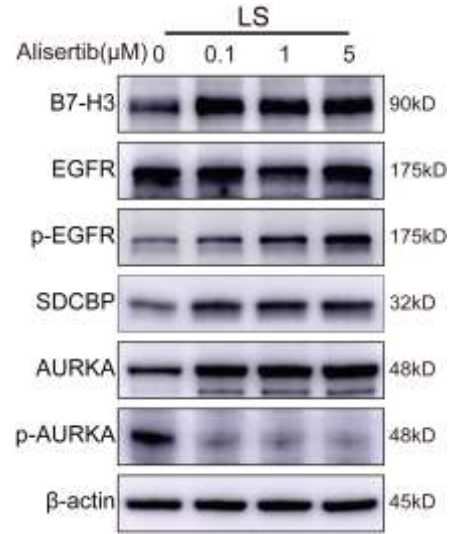

unedited gel

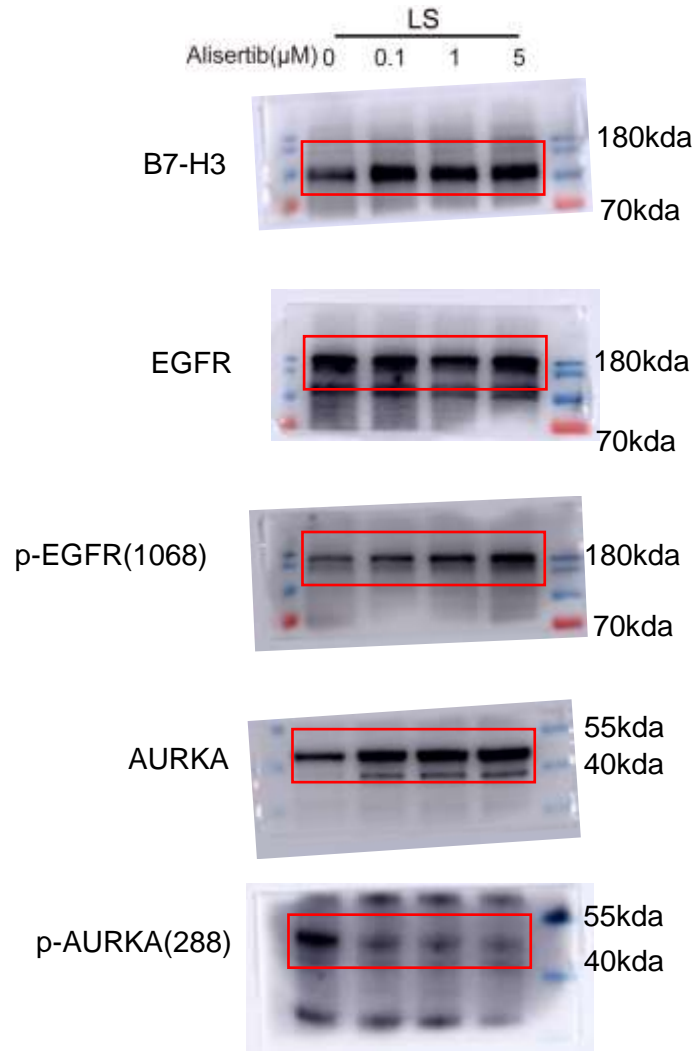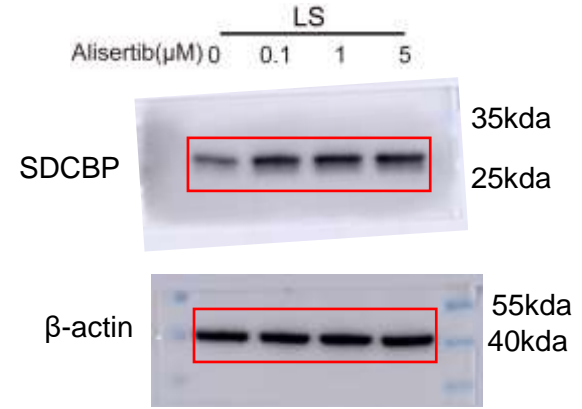

Figure 5A

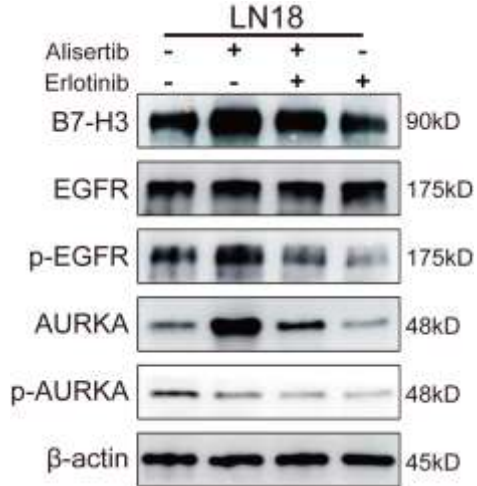

unedited gel

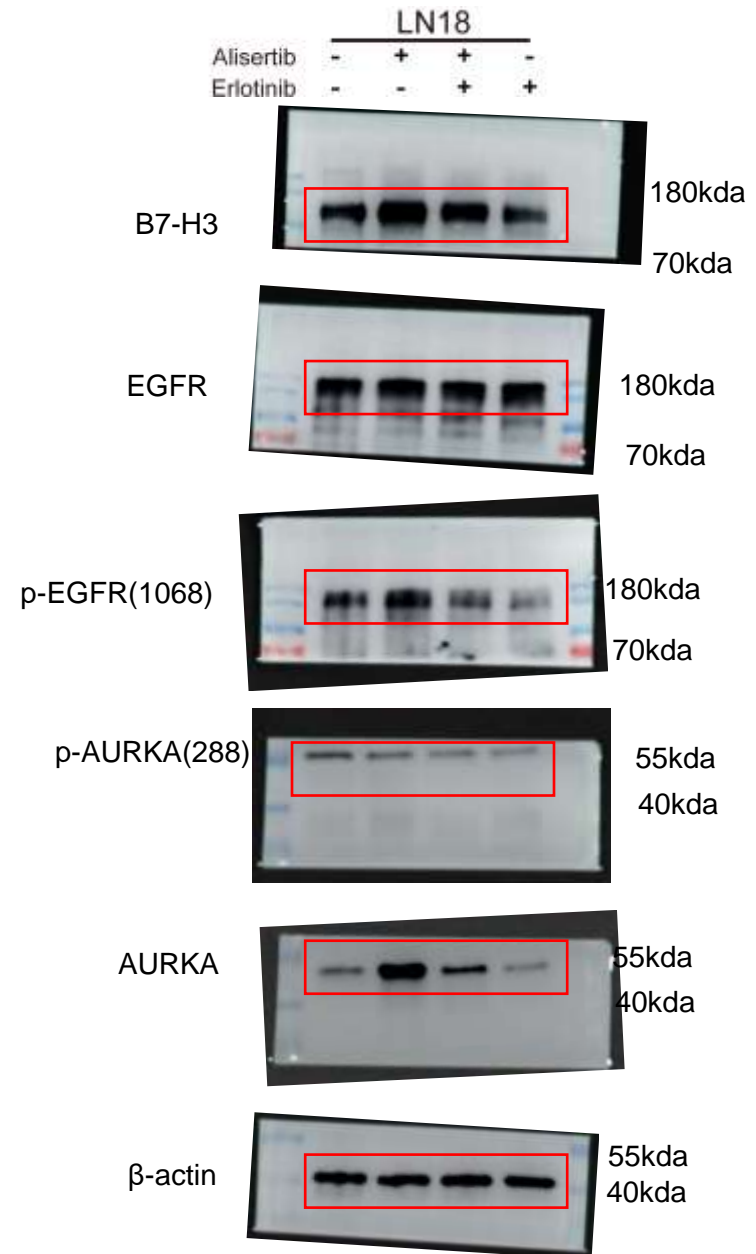

Figure 5D

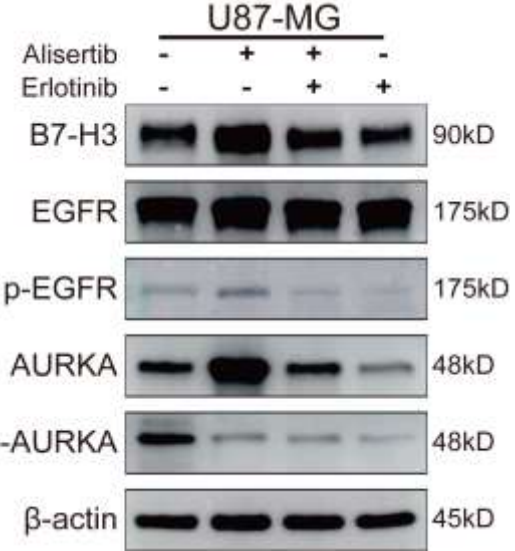

unedited gel

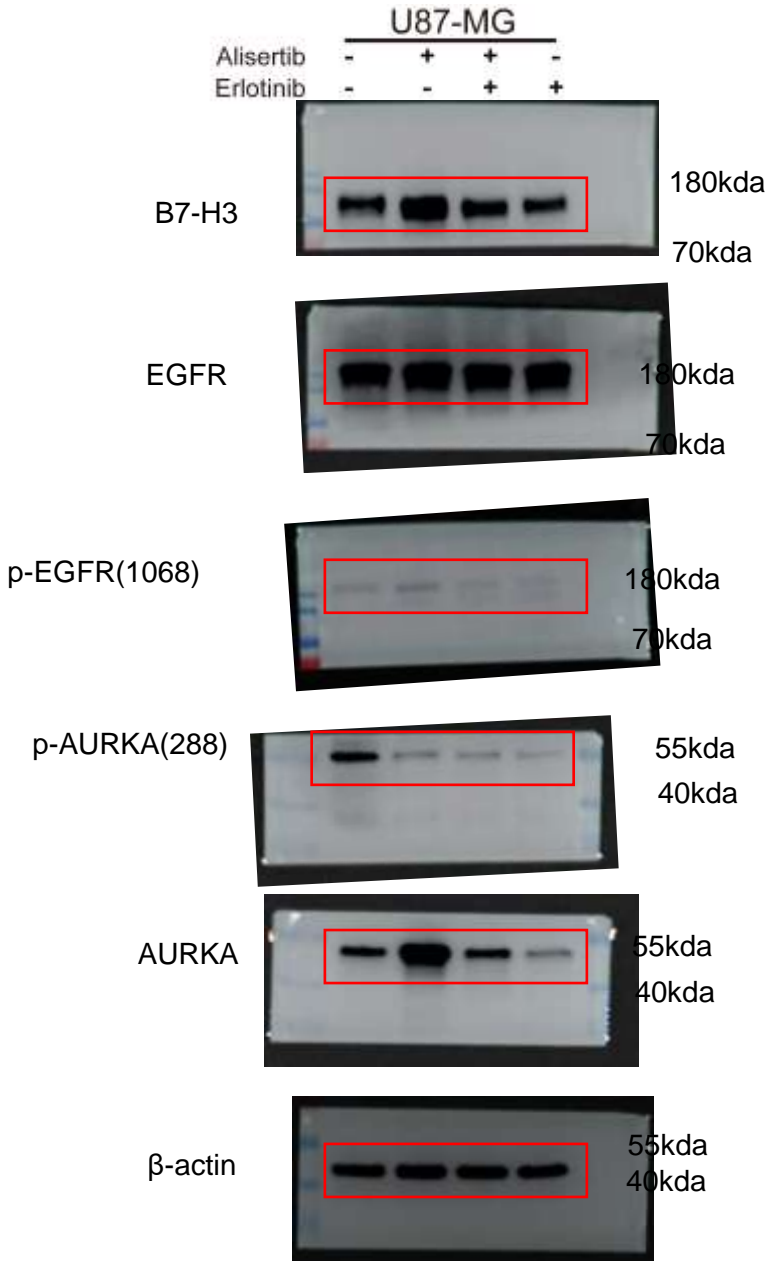

Figure S2A

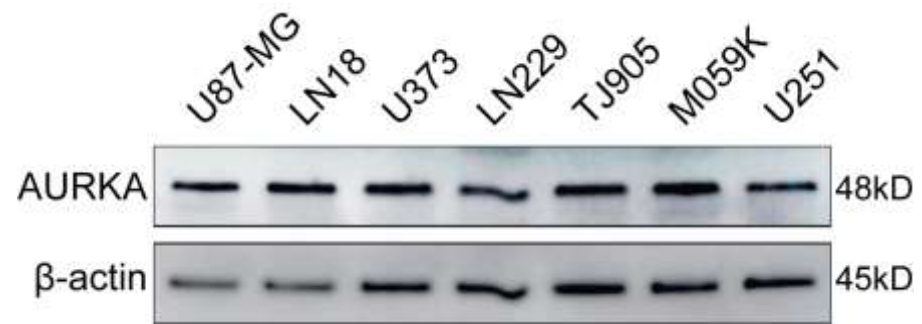

unedited gel

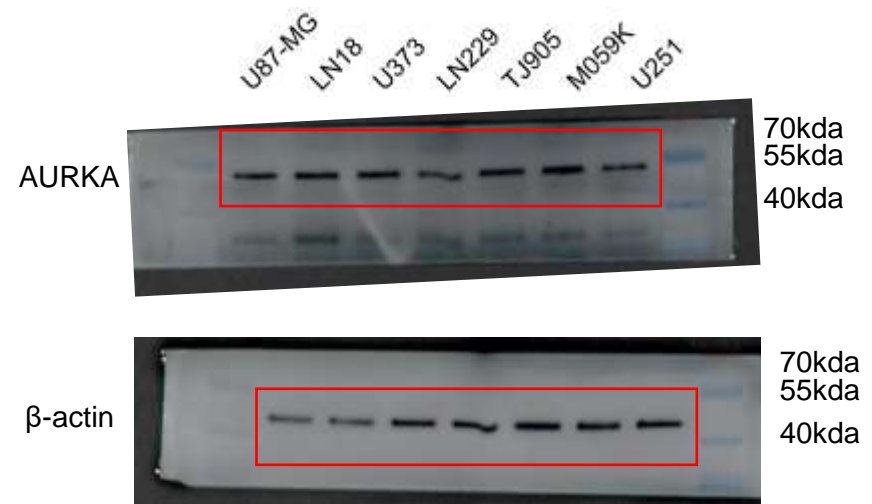

Figure S2B

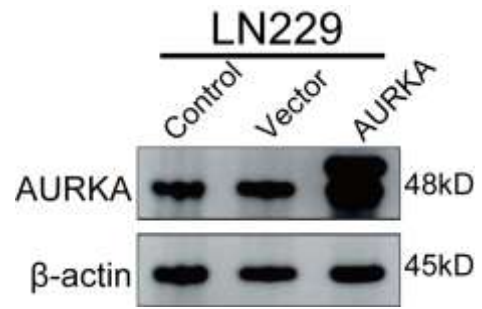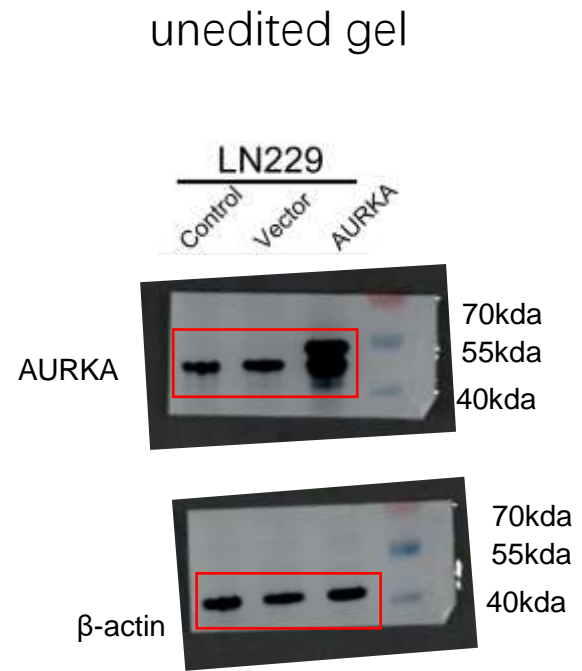

Figure S2C

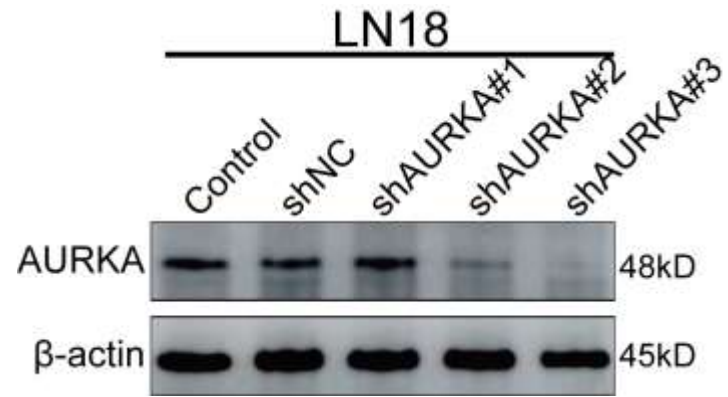

unedited gel

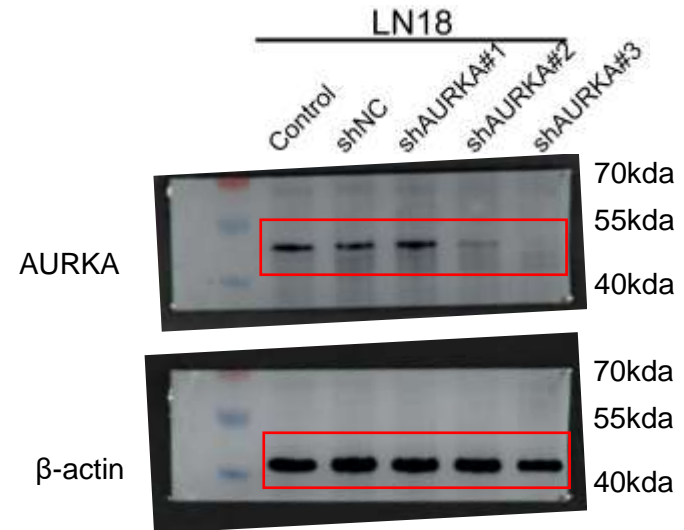

Figure S2D

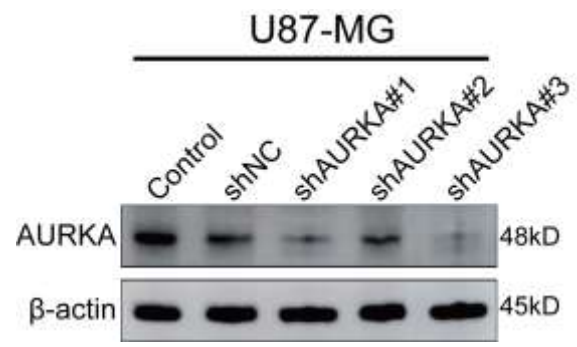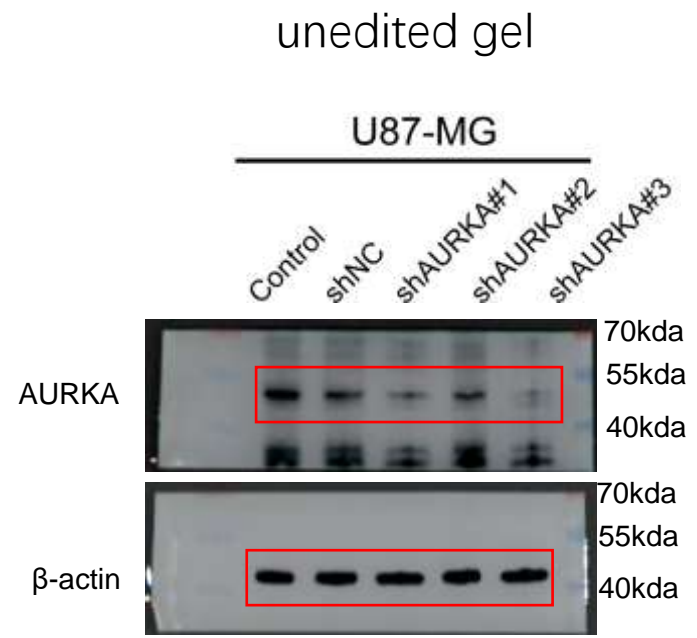

Figure S2F

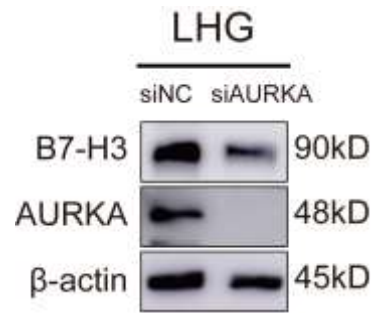

unedited gel

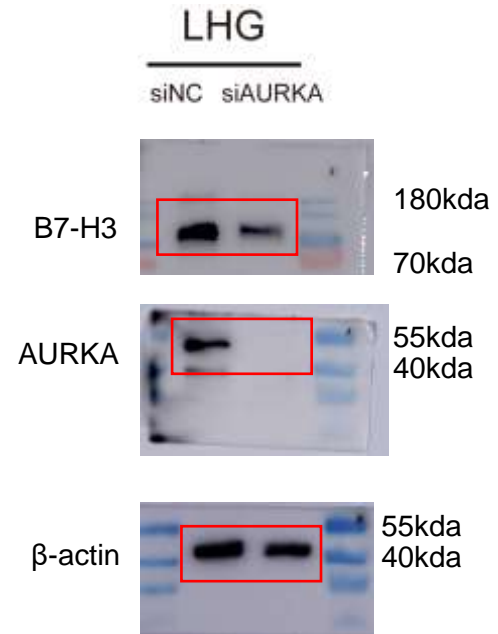

Figure S3C

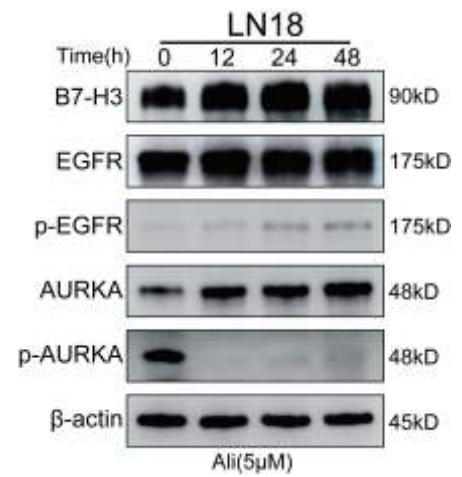

unedited gel

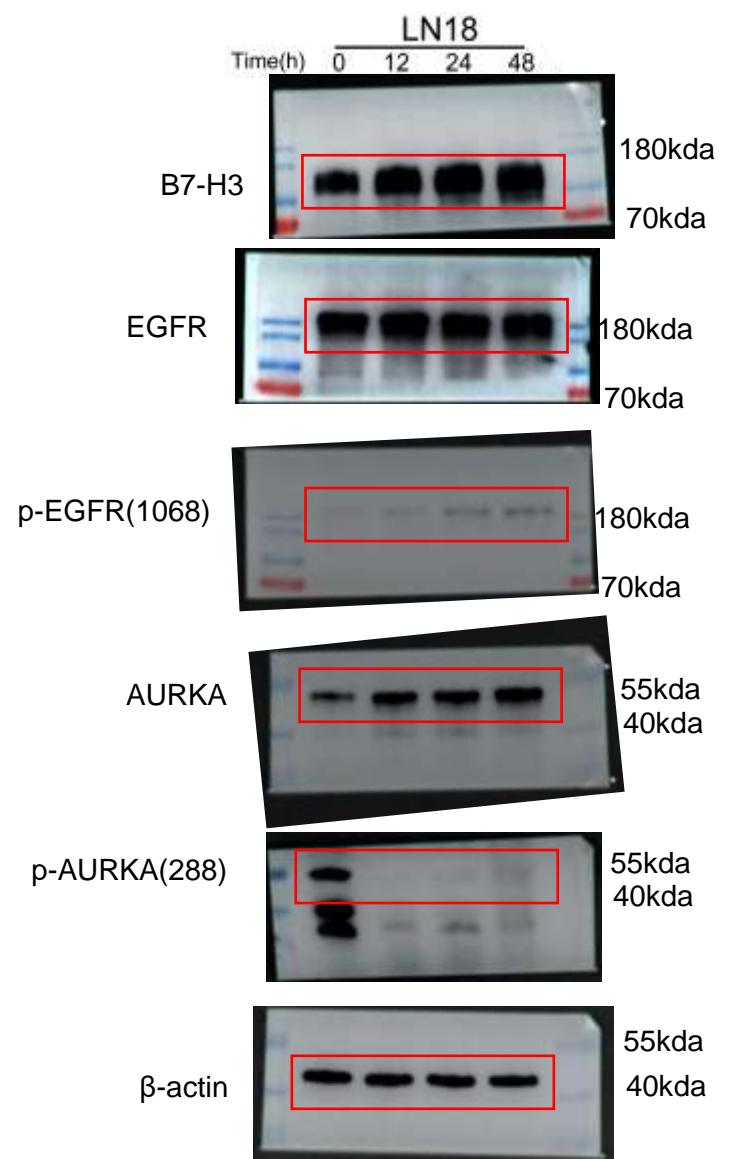

Figure S3D

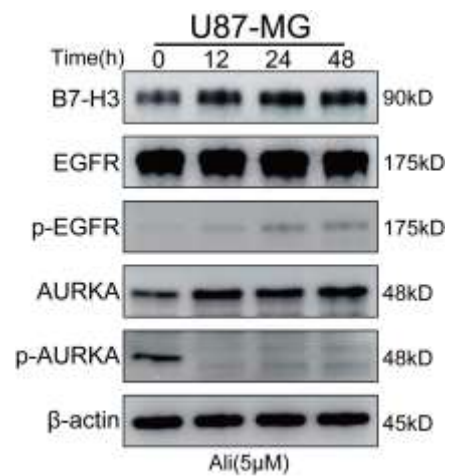

unedited gel

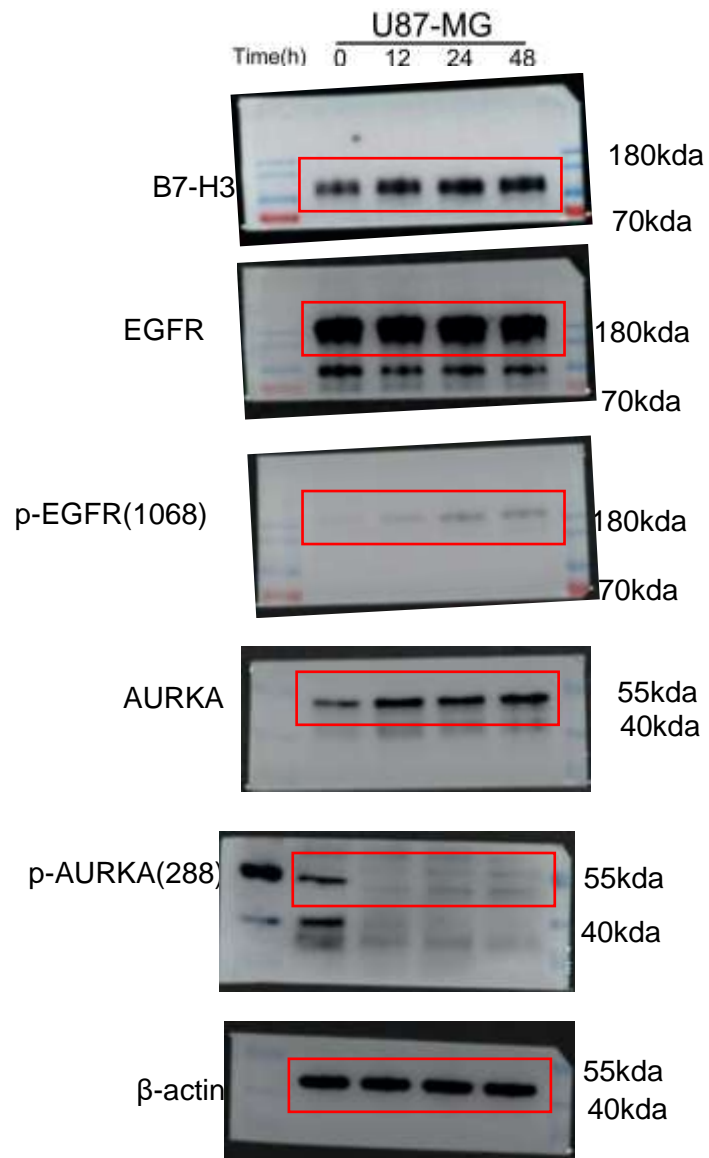

Figure S3G

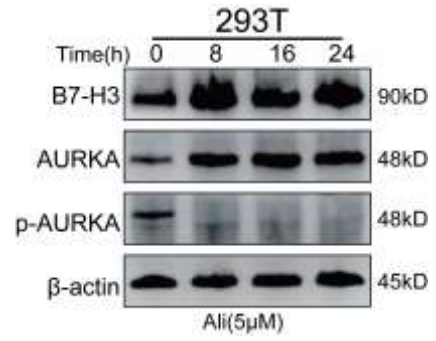

unedited gel

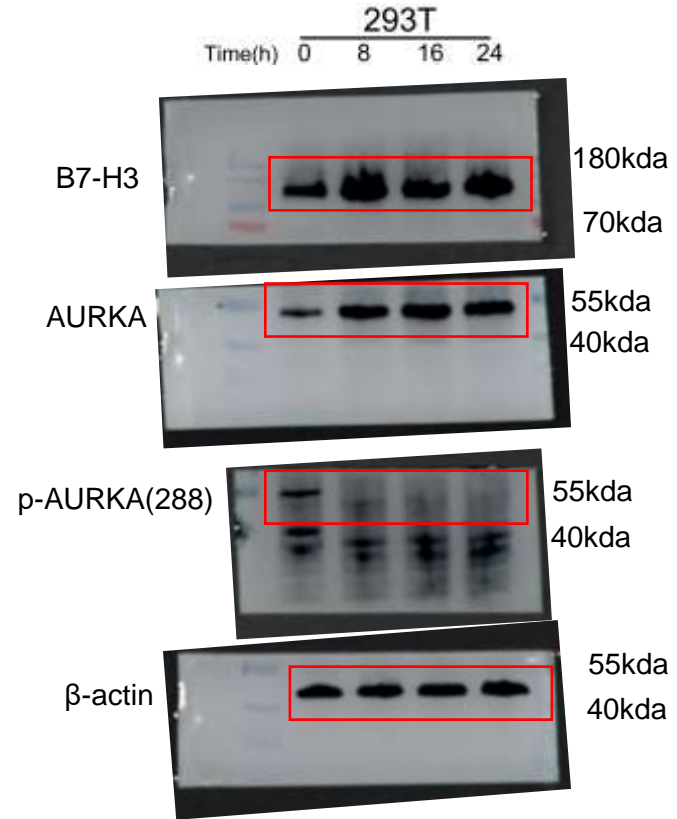

Figure S3I

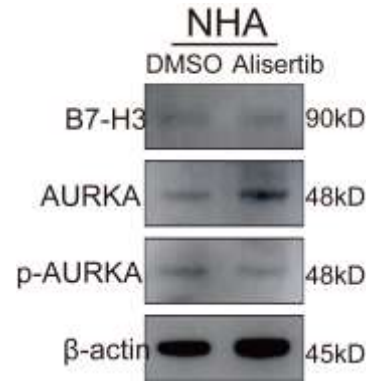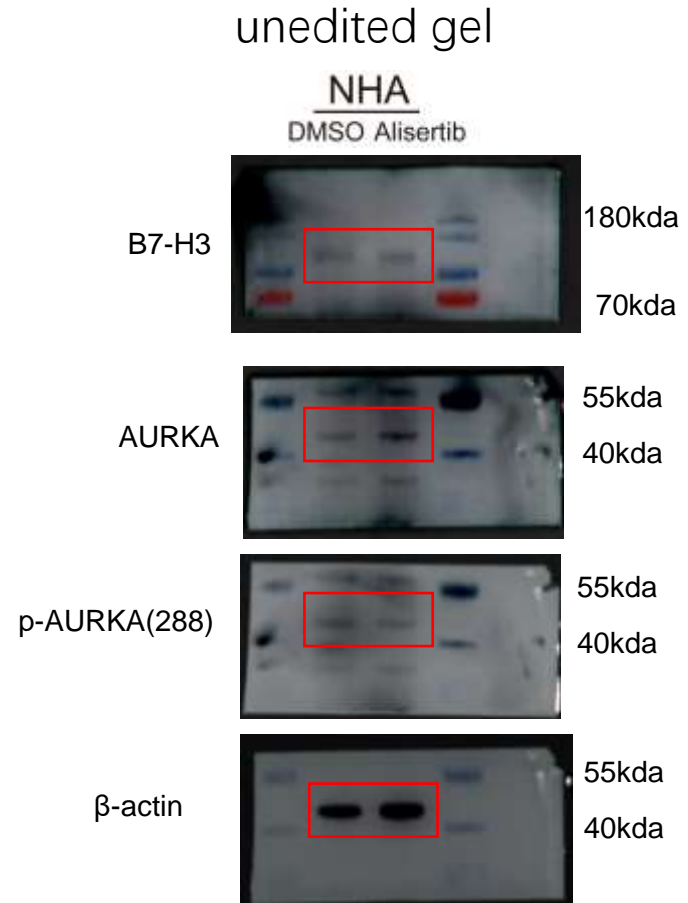

Figure S4B

unedited gel

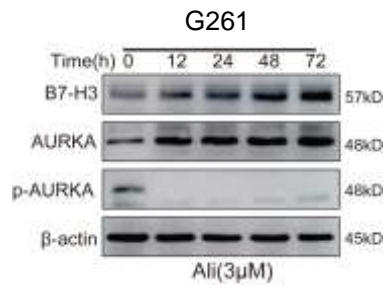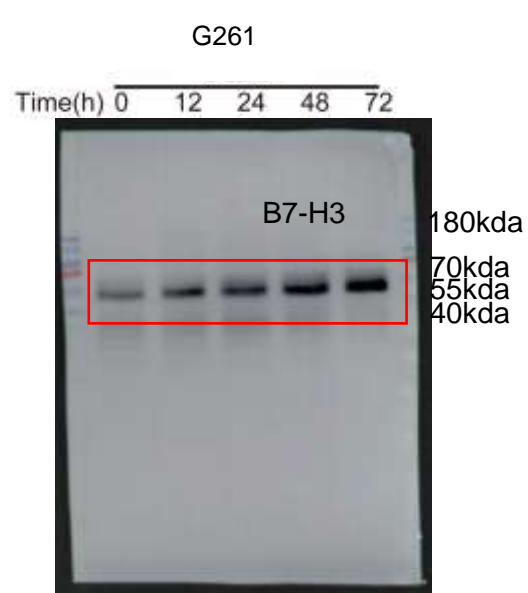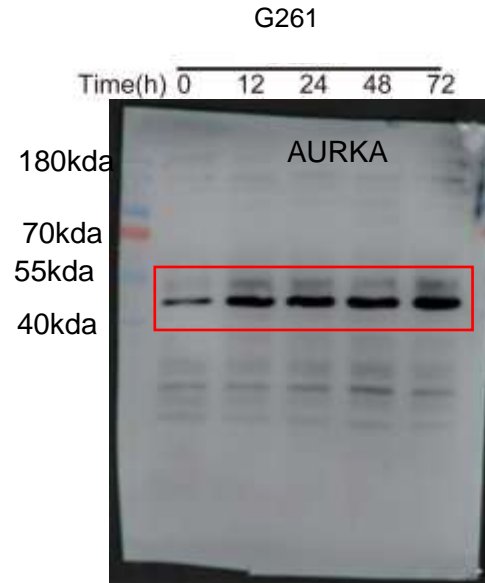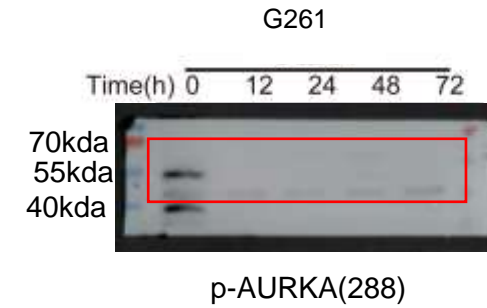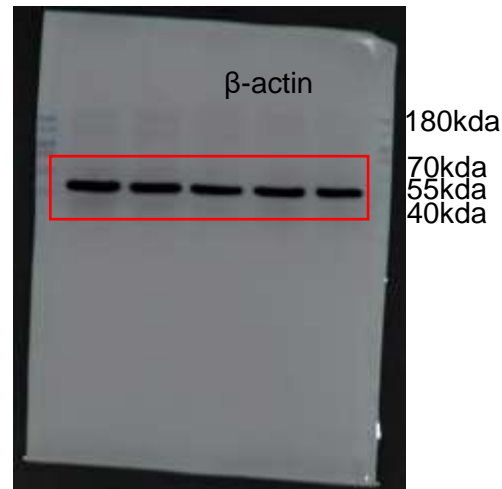

Figure S4C

unedited gel

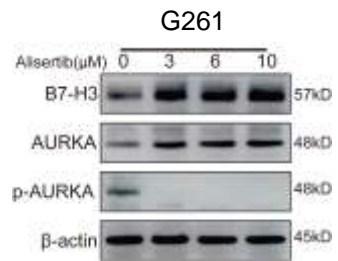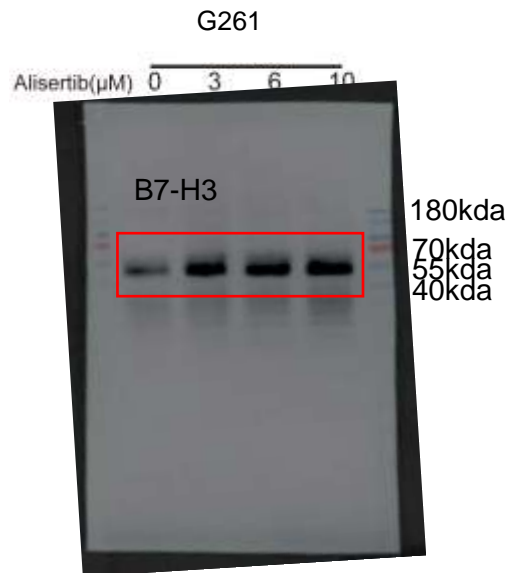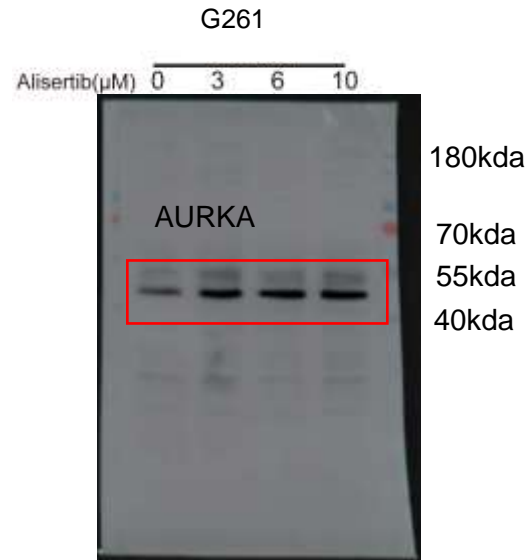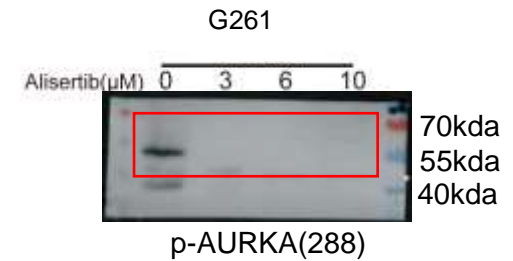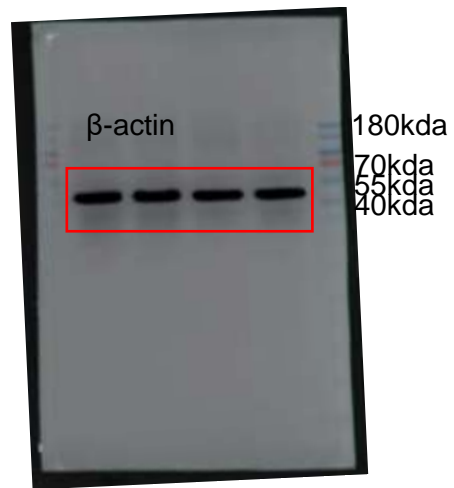

Supplement: sd2 [file 2]
